# Supplementary material for: Organometallic acids with azaborine, oxaborine, azaborole and oxaborole scaffolds
Source: Royal Society of Chemistry journal article supplement (doi:10.1039/c8nj05151h), 2018-01-01
Supplement: c8nj05151h1.pdf [file c8nj05151h1.pdf]

## Supplementary Materials

### Organometallic acids with azaborine, oxaborine, azaborole and oxaborole scaffolds

Younes Valadbeigi

Department of Chemistry, Faculty of Science, Imam Khomeini International University, Qazvin, P.O.  
Box 288, Iran.

| <b>content</b>                                                                           | <b>page</b> |
|------------------------------------------------------------------------------------------|-------------|
| <b>Table S1.</b> The NICS values for the azaboroles and oxaboroles                       | <b>S2</b>   |
| <b>Table S2.</b> The NICS values for the azaborines and oxaborines                       | <b>S3</b>   |
| <b>Table S4.</b> The NICS values for the enolic derivatives of azaboroles and oxaboroles | <b>S4</b>   |
| <b>Table S4.</b> The NICS values for the enolic derivatives of azaborines and oxaborines | <b>S6</b>   |

**Table S1.** The NICS values for the azaboroles & oxaboroles and their conjugated bases in ppm.

| Compound             | NICS(0) <sub>iso</sub> | NICS(0) <sub>zz</sub> | NICS(1) <sub>iso</sub> | NICS(1) <sub>zz</sub> |
|----------------------|------------------------|-----------------------|------------------------|-----------------------|
| 1a                   | -3.21                  | 12.52                 | -4.42                  | -9.85                 |
| 1b                   | -2.32                  | 14.30                 | -3.17                  | -8.40                 |
| (1-H) <sup>-</sup>   | -10.18                 | -9.74                 | -7.51                  | -26.60                |
| 2a                   | -3.04                  | 12.09                 | -3.62                  | -8.23                 |
| (2a-H) <sup>-</sup>  | -8.20                  | -10.57                | -7.57                  | -26.81                |
| 2b                   | -3.14                  | 13.96                 | -2.68                  | -6.50                 |
| (2b-H) <sup>-</sup>  | -5.49                  | 2.38                  | -5.66                  | -14.91                |
| 2c                   | -2.59                  | 16.01                 | -3.10                  | -6.27                 |
| (2c-H) <sup>-</sup>  | -7.51                  | -2.42                 | -4.70                  | -19.50                |
| 3a                   | -2.92                  | 11.13                 | -4.66                  | -10.01                |
| 3b                   | -1.87                  | 14.69                 | -3.38                  | -7.94                 |
| (3-H) <sup>-</sup>   | -8.24                  | -5.84                 | -6.57                  | -22.60                |
| 4a                   | -1.72                  | 8.44                  | -3.72                  | -9.16                 |
| (4a-H) <sup>-</sup>  | -5.13                  | -9.23                 | -7.17                  | -24.84                |
| 4b                   | -5.23                  | 6.70                  | -4.04                  | -8.01                 |
| (4b-H) <sup>-</sup>  | -8.62                  | -1.38                 | -6.09                  | -13.78                |
| 4c                   | -2.58                  | 14.24                 | -3.42                  | -6.90                 |
| (4c-H) <sup>-</sup>  | -5.36                  | 3.35                  | -3.80                  | -13.65                |
| 5a                   | -4.68                  | 13.36                 | -3.89                  | -7.91                 |
| 5b                   | -2.18                  | 18.31                 | -1.99                  | -4.27                 |
| (5-H) <sup>-</sup>   | -10.58                 | -4.44                 | -6.04                  | -21.37                |
| 6a                   | -5.36                  | 11.97                 | -3.14                  | -4.88                 |
| (6-H) <sup>-</sup>   | -9.90                  | -4.10                 | -6.68                  | -18.98                |
| 6b                   | -3.88                  | 18.19                 | -1.30                  | -1.13                 |
| (6b-H) <sup>-</sup>  | -7.05                  | 9.54                  | -3.80                  | -7.07                 |
| 6c                   | -4.91                  | 17.64                 | -2.25                  | -2.65                 |
| (6c-H) <sup>-</sup>  | -8.67                  | 5.35                  | -2.73                  | -11.09                |
| 7a                   | -3.74                  | 13.52                 | -3.99                  | -7.72                 |
| 7b                   | -1.59                  | 19.55                 | -2.26                  | -4.05                 |
| (7-H) <sup>-</sup>   | -8.08                  | 0.75                  | -4.98                  | -17.38                |
| 8a                   | -2.60                  | 14.55                 | -2.55                  | -4.53                 |
| (8a-H) <sup>-</sup>  | 4.27                   | 4.50                  | -2.29                  | -11.50                |
| 8b                   | -3.79                  | 17.71                 | -2.26                  | -1.84                 |
| (8b-H) <sup>-</sup>  | -8.80                  | 9.53                  | -4.70                  | -6.60                 |
| 8c                   | -3.43                  | 19.37                 | -2.35                  | -3.10                 |
| (8c-H) <sup>-</sup>  | -5.61                  | 12.59                 | -2.08                  | -6.76                 |
| 9a                   | -3.71                  | 12.86                 | -4.57                  | -9.52                 |
| 9b                   | -2.71                  | 15.24                 | -3.24                  | -7.79                 |
| (9-H) <sup>-</sup>   | -11.22                 | -8.64                 | -8.06                  | -25.94                |
| 10a                  | -4.19                  | 12.30                 | -4.03                  | -7.48                 |
| (10a-H) <sup>-</sup> | -11.49                 | -8.32                 | -7.95                  | -23.85                |
| 10b                  | -3.46                  | 16.35                 | -2.67                  | -4.94                 |
| (10b-H) <sup>-</sup> | -7.59                  | 2.81                  | -6.43                  | -15.36                |
| 10c                  | -3.34                  | 17.15                 | -3.18                  | -5.36                 |
| (10c-H) <sup>-</sup> | -9.79                  | -1.41                 | -6.25                  | -19.29                |
| 11a                  | -3.37                  | 11.90                 | -4.68                  | -9.55                 |
| 11b                  | -2.15                  | 15.68                 | -3.39                  | -7.22                 |
| (11-H) <sup>-</sup>  | -9.18                  | -4.95                 | -7.14                  | -22.36                |
| 12a                  | -2.68                  | 10.41                 | -3.71                  | -8.01                 |
| (12a-H) <sup>-</sup> | -8.49                  | -6.34                 | -7.01                  | -21.39                |
| 12b                  | -3.94                  | 13.11                 | -3.40                  | -5.02                 |
| (12b-H) <sup>-</sup> | -8.48                  | 1.93                  | -6.21                  | -12.73                |
| 12c                  | -2.85                  | 16.29                 | -3.38                  | -5.61                 |
| (12c-H) <sup>-</sup> | -6.93                  | 4.43                  | -4.91                  | -13.86                |

**Table S2.** The NICS values for the azaborines & oxaborines and their conjugated bases in ppm.

| Compound            | NICS(0) <sub>iso</sub> | NICS(0) <sub>zz</sub> | NICS(1) <sub>iso</sub> | NICS(1) <sub>zz</sub> |
|---------------------|------------------------|-----------------------|------------------------|-----------------------|
| 13a                 | 1.71                   | 12.05                 | -2.92                  | -5.77                 |
| 13b                 | 2.97                   | 12.57                 | -2.10                  | -5.25                 |
| (13-H) <sup>-</sup> | -5.64                  | -11.99                | -8.04                  | -25.32                |
| 14                  | 2.28                   | 16.32                 | -1.48                  | -1.48                 |
| (14-H) <sup>-</sup> | -2.99                  | -2.97                 | -5.03                  | -16.74                |
| 15                  | 2.84                   | 17.65                 | -1.35                  | -0.77                 |
| (15-H) <sup>-</sup> | -1.16                  | 1.32                  | -3.87                  | -13.09                |
| 16                  | 2.14                   | 18.63                 | -0.75                  | 0.71                  |
| (16-H) <sup>-</sup> | -1.51                  | 5.40                  | -3.17                  | -8.97                 |
| 17                  | 2.63                   | 20.41                 | -0.87                  | 0.82                  |
| (17-H) <sup>-</sup> | 0.06                   | 11.01                 | -2.34                  | -5.08                 |
| 18a                 | 0.90                   | 11.98                 | -2.61                  | -4.26                 |
| 18b                 | 2.85                   | 14.28                 | -1.24                  | -2.24                 |
| (18-H) <sup>-</sup> | -6.87                  | -11.09                | -7.80                  | -23.24                |
| 19                  | 0.10                   | 15.71                 | -1.46                  | -0.19                 |
| (19-H) <sup>-</sup> | -4.70                  | 0.77                  | -4.19                  | -11.82                |
| 20                  | 0.58                   | 16.74                 | -1.61                  | -0.14                 |
| (20-H) <sup>-</sup> | -2.70                  | 5.29                  | -3.11                  | -8.73                 |
| 21                  | -1.49                  | 16.60                 | -1.28                  | 1.36                  |
| (21-H) <sup>-</sup> | -5.05                  | 8.58                  | -2.82                  | -4.24                 |
| 22                  | -0.85                  | 18.02                 | -1.60                  | 0.43                  |
| (22-H) <sup>-</sup> | -3.44                  | 12.94                 | -2.51                  | -2.53                 |
| 23a                 | 1.08                   | 11.14                 | -3.25                  | -6.18                 |
| 23b                 | 2.37                   | 12.27                 | -2.30                  | -5.37                 |
| (23-H) <sup>-</sup> | -6.71                  | -12.06                | -8.56                  | -25.36                |
| 24                  | 1.32                   | 15.91                 | -1.84                  | -1.68                 |
| (24-H) <sup>-</sup> | -4.84                  | -3.90                 | -6.22                  | -17.70                |
| 25                  | 1.94                   | 17.36                 | -1.68                  | -0.90                 |
| (25-H) <sup>-</sup> | -2.88                  | 0.25                  | -5.04                  | -14.22                |
| 26                  | 0.83                   | 18.37                 | -1.24                  | 0.75                  |
| (26-H) <sup>-</sup> | -3.59                  | 4.48                  | -4.45                  | -10.05                |
| 27                  | 1.41                   | 20.16                 | -1.32                  | 0.85                  |
| (27-H) <sup>-</sup> | -1.46                  | 10.57                 | -3.22                  | -5.79                 |

**Table S3.** The NICS values for the enolic derivatives of azaboroles and oxaboroles in ppm.

| Compound | NICS (0) <sub>iso</sub> | NICS(0) <sub>zz</sub> | NICS(1) <sub>iso</sub> | NICS(1) <sub>zz</sub> |
|----------|-------------------------|-----------------------|------------------------|-----------------------|
| 28a      | -2.01                   | 15.08                 | -3.90                  | -7.80                 |
| (28a-H)  | -6.61                   | 2.58                  | -6.40                  | -18.54                |
| 28b      | -2.33                   | 14.92                 | -3.03                  | -7.11                 |
| (28b-H)  | -7.81                   | -0.30                 | -6.17                  | -19.02                |
| 28c      | -2.26                   | 14.93                 | -3.98                  | -8.08                 |
| (28c-H)  | -7.28                   | 0.69                  | -6.92                  | -19.87                |
| 28d      | -1.92                   | 15.43                 | -2.97                  | -7.01                 |
| (28d-H)  | -7.21                   | 1.21                  | -5.97                  | -18.17                |
| 29a      | -2.60                   | 16.49                 | -3.09                  | -5.55                 |
| (29a-H)  | -5.93                   | 5.88                  | -4.58                  | -13.75                |
| 29b      | -1.85                   | 17.16                 | -2.83                  | -5.21                 |
| (29b-H)  | -5.01                   | 8.05                  | -4.24                  | -12.36                |
| 30a      | -2.87                   | 12.25                 | -4.85                  | -10.04                |
| (30a-H)  | -6.01                   | 2.60                  | -6.28                  | -17.56                |
| 30b      | -2.26                   | 14.37                 | -3.52                  | -7.58                 |
| (30b-H)  | -6.28                   | 3.07                  | -5.49                  | -16.28                |
| 30c      | -2.77                   | 12.03                 | -4.86                  | -9.99                 |
| (30c-H)  | -6.52                   | 1.30                  | -6.67                  | -18.47                |
| 30d      | -1.88                   | 14.44                 | -3.55                  | -7.56                 |
| (30d-H)  | -5.91                   | 3.70                  | -5.54                  | -15.71                |
| 31a      | -2.73                   | 14.36                 | -3.67                  | -6.95                 |
| (31a-H)  | -4.63                   | 8.32                  | -3.99                  | -10.76                |
| 31b      | -2.47                   | 15.02                 | -3.55                  | -6.78                 |
| (31b-H)  | -4.08                   | 9.36                  | -3.89                  | -10.07                |
| 32a      | -3.55                   | 15.29                 | -3.56                  | -6.09                 |
| (32a-H)  | -7.63                   | 5.25                  | -5.63                  | -14.79                |
| 32b      | -3.74                   | 15.57                 | -2.69                  | -5.16                 |
| (32b-H)  | -8.08                   | 4.03                  | -4.84                  | -14.35                |
| 32c      | -3.84                   | 15.10                 | -3.70                  | -6.29                 |
| (32c-H)  | -8.23                   | 4.06                  | -5.97                  | -15.93                |
| 32d      | -2.15                   | 18.09                 | -1.96                  | -3.37                 |
| (32d-H)  | -7.57                   | 5.26                  | -4.68                  | -13.39                |
| 33a      | -5.68                   | 16.03                 | -2.63                  | -2.84                 |
| (33a-H)  | -7.83                   | 10.45                 | -3.13                  | -7.34                 |
| 33b      | -4.35                   | 17.82                 | -2.11                  | -1.85                 |
| (33b-H)  | -6.95                   | 12.15                 | -2.89                  | -6.19                 |
| 34a      | -3.64                   | 14.68                 | -4.17                  | -7.47                 |
| (34a-H)  | -6.39                   | 7.02                  | -5.28                  | -13.42                |
| 34b      | -3.22                   | 16.44                 | -3.01                  | -5.29                 |
| (34b-H)  | -6.39                   | 7.73                  | -4.32                  | -11.85                |
| 34c      | -3.54                   | 14.45                 | -4.26                  | -7.48                 |
| (34c-H)  | -6.72                   | 6.58                  | -5.43                  | -14.05                |
| 34d      | -1.94                   | 17.94                 | -2.58                  | -4.18                 |
| (34d-H)  | -6.06                   | 8.57                  | -4.31                  | -11.26                |
| 35a      | -4.09                   | 18.18                 | -2.76                  | -3.26                 |
| (35a-H)  | -5.26                   | 15.15                 | -2.65                  | -5.08                 |

**Table S3-** continued.

| Compound | NICS(0) <sub>iso</sub> | NICS(0) <sub>zz</sub> | NICS(1) <sub>iso</sub> | NICS(1) <sub>zz</sub> |
|----------|------------------------|-----------------------|------------------------|-----------------------|
| 35b      | -3.48                  | 19.07                 | -2.56                  | -3.04                 |
| (35b-H)  | -4.97                  | 15.70                 | -2.57                  | -4.76                 |
| 36a      | -3.10                  | 14.44                 | -4.27                  | -8.43                 |
| (36a-H)  | -8.10                  | 1.71                  | -7.17                  | -19.34                |
| 36b      | -4.60                  | 11.60                 | -4.23                  | -9.85                 |
| (36b-H)  | -9.15                  | -0.94                 | -6.81                  | -19.90                |
| 36c      | -3.63                  | 13.95                 | -4.60                  | -8.80                 |
| (36c-H)  | -8.75                  | 0.15                  | -7.57                  | -20.47                |
| 36d      | -3.01                  | 14.19                 | -3.52                  | -7.85                 |
| (36d-H)  | -8.60                  | 0.21                  | -6.69                  | -19.06                |
| 37a      | -5.10                  | 13.86                 | -4.16                  | -7.51                 |
| (37a-H)  | -8.31                  | 4.40                  | -5.77                  | -15.9                 |
| 37b      | -3.64                  | 16.06                 | -3.51                  | -5.97                 |
| (37b-H)  | -7.51                  | 6.64                  | -5.50                  | -13.79                |
| 38a      | -3.85                  | 11.66                 | -5.26                  | -10.56                |
| (38a-H)  | -7.30                  | 1.90                  | -7.01                  | -18.19                |
| 38b      | -4.10                  | 11.94                 | -4.48                  | -9.51                 |
| (38b-H)  | -7.63                  | 2.01                  | -6.24                  | -17.28                |
| 38c      | -3.80                  | 11.59                 | -5.29                  | -10.40                |
| (38c-H)  | -7.76                  | 1.03                  | -7.23                  | -19.02                |
| 38d      | -2.75                  | 13.81                 | -3.89                  | -8.08                 |
| (38d-H)  | -7.06                  | 2.96                  | -6.11                  | -16.51                |
| 39a      | -3.76                  | 14.76                 | -4.00                  | -6.78                 |
| (39a-H)  | -6.19                  | 8.33                  | -4.80                  | -11.27                |
| 39b      | -3.55                  | 15.55                 | -3.92                  | -6.58                 |
| (39b-H)  | -5.74                  | 9.34                  | -4.74                  | -10.63                |

**Table S4.** The NICS values for the enolic derivatives of azaborines and oxaborines in ppm.

| Compound             | NICS(0) <sub>iso</sub> | NICS(0) <sub>zz</sub> | NICS(1) <sub>iso</sub> | NICS(1) <sub>zz</sub> |
|----------------------|------------------------|-----------------------|------------------------|-----------------------|
| 40                   | 0.88                   | 10.01                 | -3.71                  | -7.41                 |
| (40-H) <sup>-</sup>  | -3.92                  | -4.34                 | -7.20                  | -19.78                |
| 41a                  | 1.26                   | 13.84                 | -2.25                  | -3.29                 |
| (41a-H) <sup>-</sup> | -1.97                  | 3.34                  | -4.43                  | -12.06                |
| 41b                  | 1.38                   | 13.88                 | -2.30                  | -3.28                 |
| (41b-H) <sup>-</sup> | -1.82                  | 3.53                  | -4.46                  | -11.91                |
| 42a                  | 1.63                   | 14.71                 | -2.13                  | -2.78                 |
| (42a-H) <sup>-</sup> | -0.77                  | 6.15                  | -3.67                  | -9.67                 |
| 42b                  | 1.85                   | 14.90                 | -2.18                  | -2.65                 |
| (42b-H) <sup>-</sup> | -0.54                  | 6.48                  | -3.69                  | -9.41                 |
| 43                   | 1.24                   | 16.03                 | -1.53                  | -0.81                 |
| (43-H) <sup>-</sup>  | -1.06                  | 9.29                  | -2.86                  | -5.97                 |
| 44                   | 1.46                   | 17.52                 | -1.63                  | -0.59                 |
| (44-H) <sup>-</sup>  | -0.26                  | 12.68                 | -2.53                  | -3.76                 |
| 45                   | 0.21                   | 10.28                 | -3.24                  | -5.76                 |
| (45-H) <sup>-</sup>  | -4.69                  | -2.89                 | -6.70                  | -17.22                |
| 46a                  | -1.34                  | 12.56                 | -2.44                  | -2.23                 |
| (46a-H) <sup>-</sup> | -3.62                  | 6.03                  | -3.70                  | -7.77                 |
| 46b                  | -0.31                  | 14.50                 | -1.89                  | -0.87                 |
| (46b-H) <sup>-</sup> | -3.36                  | 6.65                  | -3.65                  | -7.39                 |
| 47a                  | -0.57                  | 14.38                 | -2.22                  | -1.63                 |
| (47a-H) <sup>-</sup> | -2.24                  | 9.33                  | -2.98                  | -5.77                 |
| 47b                  | 0.33                   | 16.02                 | -1.89                  | -0.68                 |
| (47b-H) <sup>-</sup> | -1.93                  | 10.04                 | -3.01                  | -5.43                 |
| 48                   | -2.68                  | 14.54                 | -1.87                  | 0.55                  |
| (48-H) <sup>-</sup>  | -4.45                  | 10.70                 | -2.58                  | -2.07                 |
| 49                   | -1.94                  | 16.54                 | -2.04                  | 0.11                  |
| (49-H) <sup>-</sup>  | -3.38                  | 14.00                 | -2.52                  | -1.33                 |
| 50                   | -0.10                  | 8.38                  | -4.19                  | -8.56                 |
| (50-H) <sup>-</sup>  | -5.17                  | -5.52                 | -7.84                  | -20.73                |
| 51a                  | -1.18                  | 9.94                  | -3.68                  | -6.39                 |
| (51a-H) <sup>-</sup> | -4.01                  | 1.10                  | -5.65                  | -13.85                |
| 51b                  | 0.01                   | 12.55                 | -2.99                  | -4.34                 |
| (51b-H) <sup>-</sup> | -3.75                  | 1.72                  | -5.65                  | -13.54                |
| 52a                  | -0.35                  | 11.71                 | -3.25                  | -5.09                 |
| (52a-H) <sup>-</sup> | -2.53                  | 4.29                  | -4.74                  | -11.16                |
| 52b                  | 0.73                   | 14.02                 | -2.73                  | -3.43                 |
| (52b-H) <sup>-</sup> | -2.23                  | 4.92                  | -4.74                  | -10.91                |
| 53                   | -1.05                  | 13.92                 | -2.62                  | -2.35                 |
| (53-H) <sup>-</sup>  | -3.19                  | 7.73                  | -4.02                  | -7.32                 |
| 54                   | -0.35                  | 16.59                 | -2.35                  | -1.25                 |
| (54-H) <sup>-</sup>  | -1.80                  | 12.25                 | -3.21                  | -4.33                 |
